# Supplementary material
Source: MDPI journal article supplement (https://www.mdpi.com/2073-8994/13/8/1448)
Supplement: s1 [file s1]

## SUPPLEMENTARY MATERIALS

# The interplay between diradical character and stability in organic molecules

Vaska Petakova<sup>1</sup>, Miroslava Nedyalkova<sup>1,2</sup>, Joanna Stoycheva<sup>1</sup>, Alia Tadjer<sup>1</sup> and Julia Romanova<sup>1,\*</sup>

<sup>1</sup>*Sofia University, Faculty of Chemistry and Pharmacy, J. Bourchier blvd. 1, Sofia 1164, Bulgaria;*

<sup>2</sup>*University of Fribourg, Department of Chemistry, Chemin du Musée 9, Fribourg 1700, Switzerland*

*\*Correspondence: [jromanova@chem.uni-sofia.bg](mailto:jromanova@chem.uni-sofia.bg)*

**Table S1.** Dataset used for the K-means clustering of quinone methides: REPE [ $\beta$ ] – resonance energy per  $\pi$ -electron,  $\Delta E_i$  [ $\beta^{-1}$ ] and  $\Delta E_{ij}$  [ $\beta^{-1}$ ] – Hückel reactivity indices, P – generalized stability index, I [eV] – vertical ionization potential, A [eV] – vertical electron affinity,  $\chi$  [eV] – electronegativity,  $\eta$  [eV] – hardness,  $\delta$  [eV $^{-1}$ ] – softness,  $\omega$  [eV] – electrophilicity,  $f_{\max}$  – largest atomic Fukui index for electrophilic attack,  $f_{\max}^+$  largest atomic Fukui index for nucleophilic attack,  $f_{\max}^0$  – largest atomic Fukui index for radical attack; Lab<sub>s</sub> – laboratory stability and its corresponding code.

|      | REPE   | $\Delta E_i$ | $\Delta E_{ij}$ | P     | I    | A    | $\chi$ | $\eta$ | $\delta$ | $\omega$ | DRC   | $f_{\max}$ | $f_{\max}^+$ | $f_{\max}^0$ | Code | Lab <sub>s</sub>  |
|------|--------|--------------|-----------------|-------|------|------|--------|--------|----------|----------|-------|------------|--------------|--------------|------|-------------------|
| Ia   | 0.0340 | 1.6139       | 0.471           | 19.6  | 8.71 | 0.49 | 4.60   | 8.22   | 0.12     | 1.28     | 0.114 | 0.120      | 0.160        | 0.140        | 1    | unstable          |
| Ib   | 0.0442 | 1.2240       | 0.275           | 57.4  | 7.26 | 1.05 | 4.16   | 6.22   | 0.16     | 1.39     | 0.198 | 0.059      | 0.048        | 0.054        | 3    | stable            |
| IIa  | 0.0338 | 1.5847       | 0.451           | 20.7  | 8.29 | 0.59 | 4.44   | 7.70   | 0.13     | 1.28     | 0.152 | 0.127      | 0.152        | 0.140        | 1    | unstable          |
| IIb  | 0.0356 | 1.2670       | 0.292           | 42.1  | 6.92 | 1.07 | 4.00   | 5.86   | 0.17     | 1.36     | 0.257 | 0.078      | 0.059        | 0.066        | 2    | moderately stable |
| IIIa | 0.0472 | 1.3277       | 0.387           | 40.2  | 8.03 | 0.61 | 4.32   | 7.42   | 0.13     | 1.26     | 0.107 | 0.096      | 0.127        | 0.111        | 2    | moderately stable |
| IIIb | 0.0410 | 1.0853       | 0.264           | 67.7  | 6.99 | 0.88 | 3.93   | 6.11   | 0.16     | 1.27     | 0.140 | 0.059      | 0.058        | 0.050        | 3    | stable            |
| IVa  | 0.0470 | 1.3868       | 0.421           | 35.2  | 7.81 | 0.58 | 4.19   | 7.23   | 0.14     | 1.22     | 0.114 | 0.108      | 0.137        | 0.122        | 4    | -                 |
| IVb  | 0.0414 | 1.1182       | 0.280           | 57.8  | 6.77 | 1.03 | 3.90   | 5.74   | 0.17     | 1.32     | 0.201 | 0.074      | 0.049        | 0.061        | 3    | stable            |
| Va   | 0.0255 | 1.9846       | 0.595           | 9.4   | 7.67 | 1.17 | 4.42   | 6.51   | 0.15     | 1.50     | 0.275 | 0.138      | 0.127        | 0.133        | 4    | -                 |
| Vb   | 0.0395 | 1.4574       | 0.319           | 37.2  | 6.64 | 1.52 | 4.08   | 5.12   | 0.20     | 1.62     | 0.375 | 0.077      | 0.051        | 0.064        | 2    | moderately stable |
| VIa  | 0.0274 | 1.9117       | 0.526           | 11.9  | 7.16 | 1.32 | 4.24   | 5.84   | 0.17     | 1.54     | 0.394 | 0.090      | 0.125        | 0.107        | 1    | unstable          |
| VIb  | 0.0329 | 1.4998       | 0.326           | 29.4  | 6.22 | 1.56 | 3.89   | 4.66   | 0.21     | 1.63     | 0.508 | 0.080      | 0.046        | 0.063        | 2    | moderately stable |
| VIIa | 0.0470 | 1.3772       | 0.423           | 35.3  | 8.24 | 0.52 | 4.38   | 7.72   | 0.13     | 1.24     | 0.095 | 0.139      | 0.135        | 0.137        | 4    | -                 |
| VIIb | 0.0480 | 1.0643       | 0.259           | 76.2  | 7.03 | 1.03 | 4.03   | 6.00   | 0.17     | 1.35     | 0.183 | 0.063      | 0.049        | 0.056        | 3    | stable            |
| VIII | 0.0277 | 1.8897       | 0.590           | 10.9  | 7.19 | 1.36 | 4.28   | 5.83   | 0.17     | 1.57     | 0.416 | 0.117      | 0.106        | 0.111        | 4    | -                 |
| IX   | 0.0271 | 1.8806       | 0.543           | 11.6  | 7.46 | 1.29 | 4.37   | 6.17   | 0.16     | 1.55     | 0.348 | 0.108      | 0.111        | 0.109        | 4    | -                 |
| X    | 0.0510 | 0.9220       | 0.242           | 9.3   | 7.26 | 1.22 | 4.24   | 6.05   | 0.17     | 1.49     | 0.346 | 0.125      | 0.122        | 0.124        | 4    | -                 |
| XIa  | 0.0267 | 1.9819       | 0.633           | 60.0  | 7.87 | 0.47 | 4.17   | 7.40   | 0.14     | 1.17     | 0.072 | 0.127      | 0.100        | 0.114        | 3    | stable            |
| XIb  | 0.0539 | 1.1758       | 0.334           | 100.0 | 7.20 | 0.60 | 3.90   | 6.61   | 0.15     | 1.15     | 0.074 | 0.049      | 0.046        | 0.043        | 3    | stable            |
| XII  | 0.0539 | 1.2410       | 0.376           | 50.5  | 7.71 | 0.59 | 4.15   | 7.12   | 0.14     | 1.21     | 0.084 | 0.080      | 0.120        | 0.100        | 2    | moderately stable |
| XIII | 0.0305 | 2.2465       | 0.665           | 8.9   | 7.10 | 1.54 | 4.32   | 5.56   | 0.18     | 1.68     | 0.393 | 0.120      | 0.112        | 0.116        | 4    | -                 |

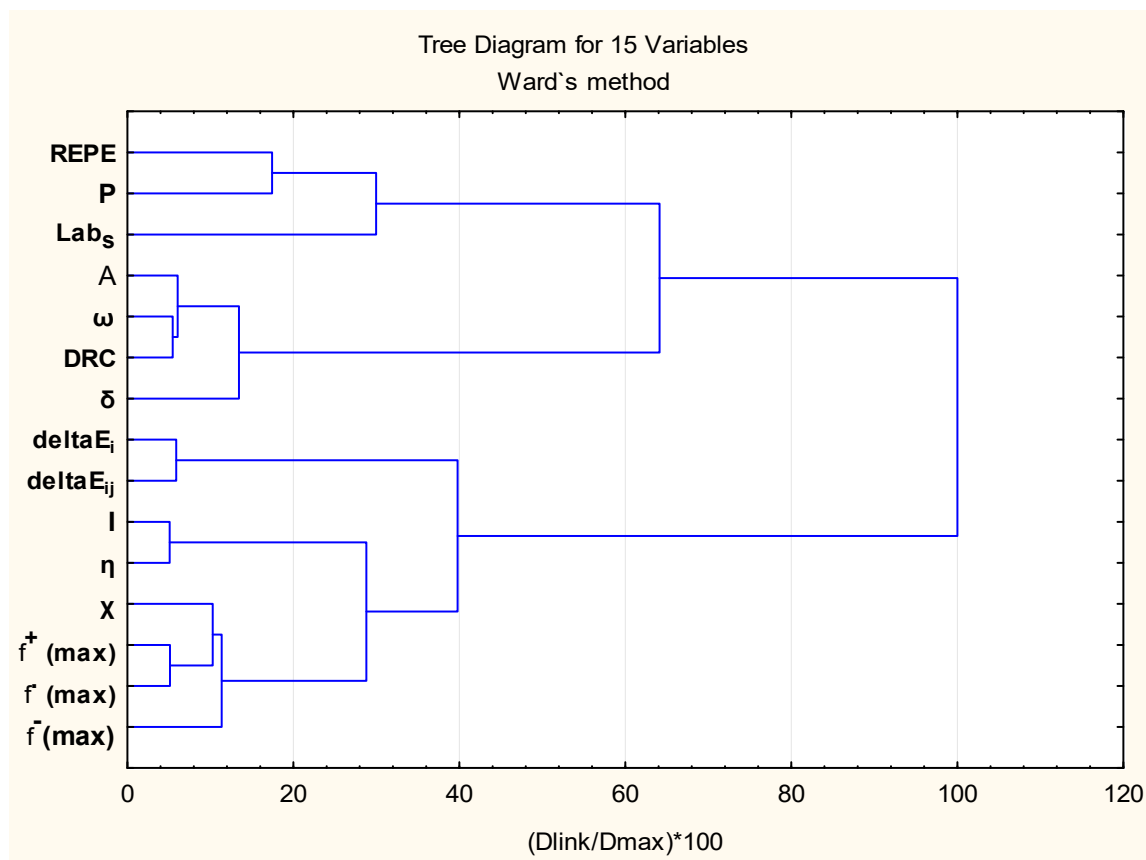

**Figure S1.** Hierarchical clustering for the variable – dendrogram representation. REPE [ $\beta$ ] – resonance energy per  $\pi$ -electron, DeltaE<sub>i</sub> [ $\beta^{-1}$ ] and DeltaE<sub>ij</sub> [ $\beta^{-1}$ ] – Hückel reactivity indices, P – generalized stability index, I [eV] – vertical ionization potential, A [eV] – vertical electron affinity,  $\chi$  [eV] – electronegativity,  $\eta$  [eV] – hardness,  $\delta$  [eV<sup>-1</sup>] – softness,  $\omega$  [eV] – electrophilicity,  $f_{\max}^+$  – largest atomic Fukui index for electrophilic attack,  $f_{\max}^+$  largest atomic Fukui index for nucleophilic attack,  $f^0(\max)$  – largest atomic Fukui index for radical attack; Lab<sub>s</sub> – laboratory stability.

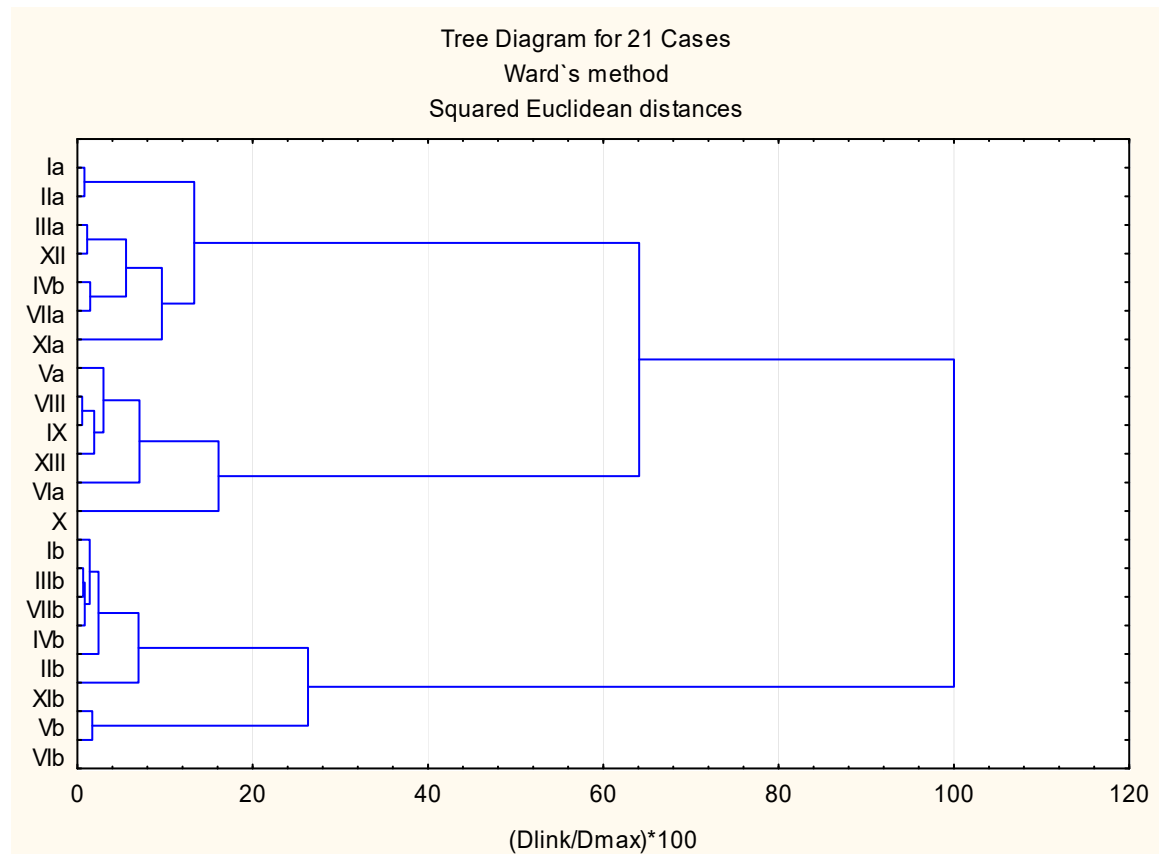

**Figure S2.** Hierarchical clustering of the objects – a dendrogram representation.

**Tables S2-S4: Members distribution in the obtained clusters from K-means clustering:**

| Members of Cluster Number 3 (Jul_second.sta)<br>and Distances from Respective Cluster Center<br>Cluster contains 7 cases |          |
|--------------------------------------------------------------------------------------------------------------------------|----------|
|                                                                                                                          | Distance |
| Ia                                                                                                                       | 0,706200 |
| IIa                                                                                                                      | 0,530343 |
| IIIa                                                                                                                     | 0,329001 |
| IVa                                                                                                                      | 0,484408 |
| VIIa                                                                                                                     | 0,505363 |
| XIa                                                                                                                      | 0,773103 |
| XII                                                                                                                      | 0,659780 |

| Members of Cluster Number 2 (Jul_second.sta)<br>and Distances from Respective Cluster Center<br>Cluster contains 6 cases |          |
|--------------------------------------------------------------------------------------------------------------------------|----------|
|                                                                                                                          | Distance |
| Ib                                                                                                                       | 0,316211 |
| IIb                                                                                                                      | 0,489626 |
| IIIb                                                                                                                     | 0,180973 |
| IVb                                                                                                                      | 0,280261 |
| VIIb                                                                                                                     | 0,203413 |
| XIb                                                                                                                      | 0,662530 |

| Members of Cluster Number 1 (Jul_second.sta)<br>and Distances from Respective Cluster Center<br>Cluster contains 8 cases |          |
|--------------------------------------------------------------------------------------------------------------------------|----------|
|                                                                                                                          | Distance |
| Va                                                                                                                       | 0,803030 |
| Vb                                                                                                                       | 0,841881 |
| VIa                                                                                                                      | 0,607413 |
| VIb                                                                                                                      | 1,071743 |
| VIII                                                                                                                     | 0,392537 |
| IX                                                                                                                       | 0,462811 |
| X                                                                                                                        | 0,974783 |
| XIII                                                                                                                     | 0,639119 |
